# Supplementary material for: Facile preparation of a superamphiphobic fabric coating with hierarchical TiO2 particles
Source: Royal Society of Chemistry journal article supplement (doi:10.1039/d0nj04032k), 2020-01-01
Supplement: d0nj04032k1.pdf [file d0nj04032k1.pdf]

Electronic Supporting information

**Facile preparation of superamphiphobic fabric coating with  
hierarchical TiO<sub>2</sub> particles**

Jixin Ai<sup>a,b</sup> and Zhiguang Guo<sup>a,b,\*</sup>

<sup>a</sup> Hubei Collaborative Innovation Centre for Advanced Organic Chemical Materials and Ministry of Education Key Laboratory for the Green Preparation and Application of Functional Materials, Hubei University, Wuhan 430062, China

<sup>b</sup> State Key Laboratory of Solid Lubrication, Lanzhou Institute of Chemical Physics, Chinese Academy of Sciences, Lanzhou, People's Republic of China.

Corresponding author: Z. Guo (E-mail address: [zguo@licp.cas.cn](mailto:zguo@licp.cas.cn)).

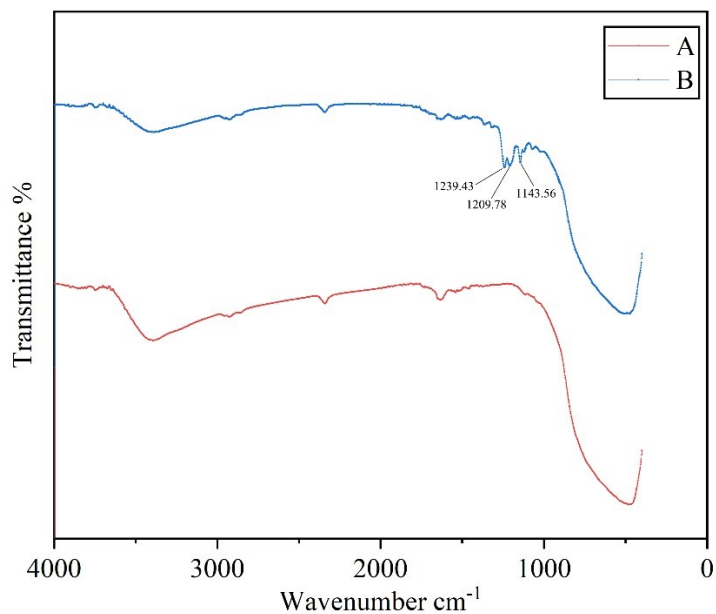

Fig. S1. FT-IR spectra of the FOTS-TiO<sub>2</sub> particles

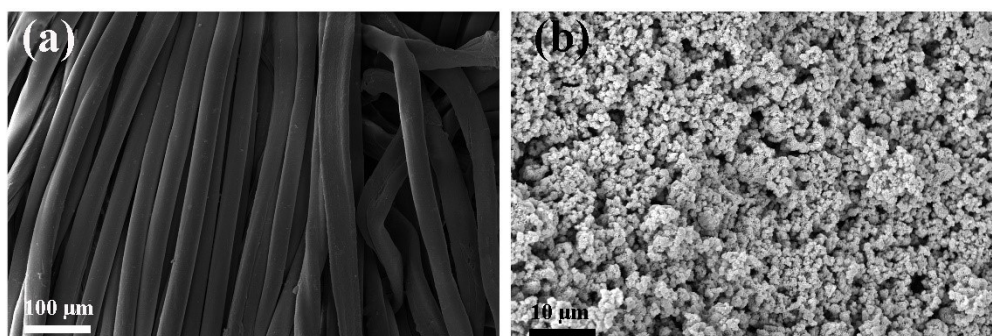

Fig. S2. SEM of (a) original cotton fabric and (b) cotton fiber surface is tightly covered by F-TiO<sub>2</sub> nanoparticles

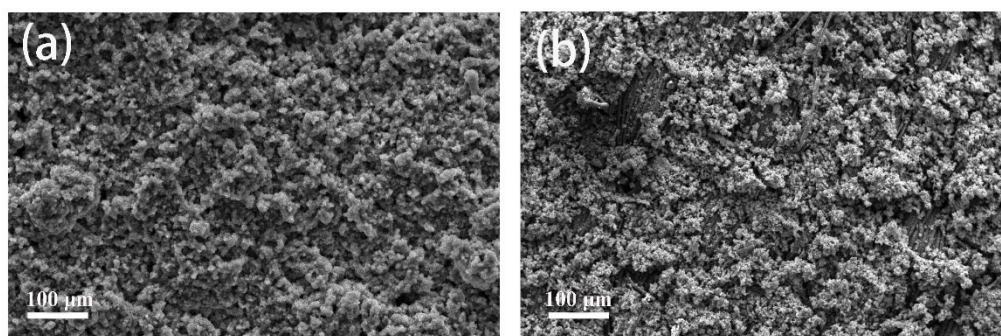

Fig. S3. SEM of (a) before and (b) after the mechanical stability test

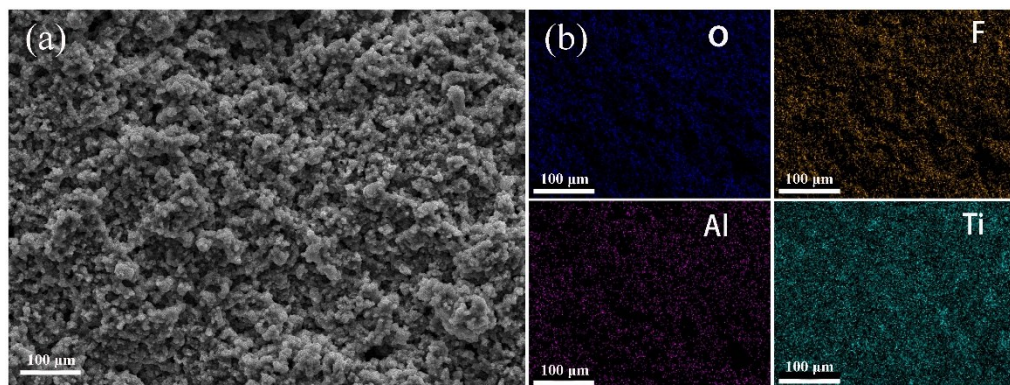

Fig. S4 (a) SEM of TiO<sub>2</sub> particles on the fabric surface and (b) Element mapping images of F- TiO<sub>2</sub> particles.

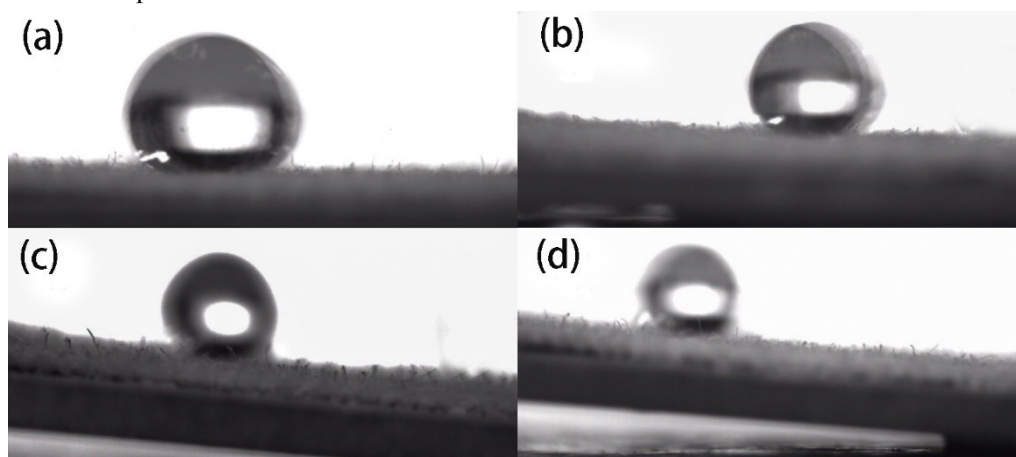

Fig. S5 The sliding angle measurements of water, rapeseed oil, glycerin and n-hexadecane, were shown in the (a, b, c, d) respectively.
